# Supplementary material for: Assessment of suitable reference genes for RT–qPCR studies in chronic rhinosinusitis
Source: PubMed Central journal article supplement (PMC5785529; doi:10.1038/s41598-018-19834-9), 2018-01-25
Supplement: 41598_2018_19834_MOESM1_ESM.pdf [file 41598_2018_19834_MOESM1_ESM.pdf]

1 **Assessment of suitable reference genes for RT-qPCR studies in chronic rhinosinusitis**

2

3 Tsuguhisa Nakayama, Naoko Okada, Mamoru Yoshikawa, Daiya Asaka, Akihito Kuboki,

4 Hiromi Kojima, Yasuhiro Tanaka, Shin-ichi Haruna

5

6 Corresponding author: Tsuguhisa Nakayama

7

8 **Supplementary information**

| <b>Variables</b> | <b>Slope</b> | <b>Efficiency</b> | <b>R<sup>2</sup></b> | <b>Intercept</b> |
|------------------|--------------|-------------------|----------------------|------------------|
| <i>ACTB</i>      | -3.167       | 106.7             | 0.998                | 24.048           |
| <i>ATP5F1</i>    | -3.280       | 101.8             | 0.995                | 29.535           |
| <i>B2M</i>       | -3.167       | 106.9             | 0.997                | 25.409           |
| <i>GAPDH</i>     | -3.144       | 108.0             | 0.996                | 26.556           |
| <i>GUSB</i>      | -3.159       | 107.3             | 0.995                | 31.360           |
| <i>HPRT1</i>     | -3.122       | 109.1             | 0.996                | 31.260           |
| <i>PGKI</i>      | -3.200       | 105.4             | 0.993                | 30.202           |
| <i>PPIA</i>      | -3.156       | 107.4             | 0.994                | 25.494           |
| <i>RPLP0</i>     | -3.240       | 103.5             | 0.987                | 25.193           |
| <i>RPLP1</i>     | -3.107       | 109.8             | 0.994                | 23.812           |
| <i>RPLP2</i>     | -3.176       | 102.0             | 0.999                | 25.036           |
| <i>RPS18</i>     | -3.121       | 109.1             | 0.998                | 24.873           |
| <i>TBP</i>       | -3.235       | 103.8             | 0.975                | 33.082           |
| <i>TFRC</i>      | -3.219       | 104.4             | 0.989                | 30.780           |
| <i>YWHAZ</i>     | -3.259       | 102.3             | 0.998                | 28.498           |

9

10 **Supplementary Table S1. qPCR parameters for the standard curve for each primer pair**

| Variables                               | First stage       |                   |                  |                    | p value | Second stage       |                     |                  |         |
|-----------------------------------------|-------------------|-------------------|------------------|--------------------|---------|--------------------|---------------------|------------------|---------|
|                                         | NP CRSwNP<br>n=11 | UP CRSwNP<br>n=10 | UP CRSsNP<br>n=8 | UP Control<br>n=10 |         | NP ECRSwNP<br>n=13 | NP NECRSwNP<br>n=15 | UP CRSsNP<br>n=8 | p value |
| Age (mean ± SD)                         | 51.9 ± 19.2       | 59.1 ± 12.6       | 50.9 ± 14.7      | 41.0 ± 11.2        | 0.086   | 53.8 ± 10.0        | 55.9 ± 18.8         | 51.1 ± 19.4      | 0.813   |
| Sex, %female                            | 18.2              | 10.0              | 50.0             | 20.0               | 0.218   | 61.5               | 26.7                | 37.5             | 0.169   |
| CT score                                | 14.8 ± 4.6        | 14.4 ± 3.1        | 9.8 ± 2.7        | -                  | 0.100   | 11.2 ± 6.0         | 10.7 ± 5.6          | 5.9 ± 3.3        | 0.047   |
| Polyp Score                             | 4.8 ± 2.0         | 4.1 ± 1.7         | -                | -                  | 0.427   | 8.0 ± 6.6          | 3.1 ± 2.9           | -                | 0.010   |
| Asthma, n(%)                            | 1 (9.1)           | 0 (0.0)           | 1 (12.5)         | 1 (10.0)           | 0.761   | 7 (53.8)           | 4 (26.7)            | 2 (25.0)         | 0.249   |
| Previous surgery, n (%)                 | 1 (9.1)           | 0 (0.0)           | 0 (0.0)          | 0 (0.0)            | 0.455   | 4 (19.4)           | 2 (13.3)            | 1 (12.5)         | 0.434   |
| History of smoking                      |                   |                   |                  |                    |         |                    |                     |                  |         |
| Current smoker, n (%)                   | 3 (27.3)          | 1 (10.0)          | 1 (12.5)         | 1 (10.0)           | 0.639   | 0 (0.0)            | 2 (13.3)            | 1 (12.5)         | 0.396   |
| Past smoker, n (%)                      | 2 (18.2)          | 5 (50.0)          | 2 (25.0)         | 3 (30.0)           | 0.443   | 3 (23.1)           | 8 (53.5)            | 4 (50.0)         | 0.233   |
| Blood test                              |                   |                   |                  |                    |         |                    |                     |                  |         |
| White blood cells (10 <sup>3</sup> /μl) | 6.4 ± 1.3         | 5.6 ± 1.1         | 6.1 ± 1.9        | 5.8 ± 1.2          | 0.514   | 6.8 ± 2.2          | 6.0 ± 1.1           | 5.1 ± 1.5        | 0.086   |
| Eosinophils (%)                         | 5.9 ± 4.6         | 5.5 ± 2.5         | 6.3 ± 2.3        | 3.7 ± 2.4          | 0.272   | 7.7 ± 4.7          | 4.5 ± 2.5           | 5.1 ± 2.5        | 0.078   |
| Total IgE (IU/ml)                       | 197.3 ± 320.8     | 162.7 ± 188.2     | 218.1 ± 180.0    | 1383.1 ± 2460.0    | 0.717   | 153.1 ± 121.7      | 206.2 ± 240.4       | 439.7 ± 363.7    | 0.192   |

11

12 **Supplementary Table S2. Demographic and clinical characteristics of the participants**

13 NP = nasal polyp, UP = uncinat process, CRSwNP = chronic rhinosinusitis with nasal polyps,

14 CRSsNP = chronic rhinosinusitis without nasal polyps, ECRSwNP = eosinophilic chronic

15 rhinosinusitis with nasal polyps, NECRSwNP = non-eosinophilic chronic rhinosinusitis with nasal

16 polyps, CT = computed tomography.

17

18

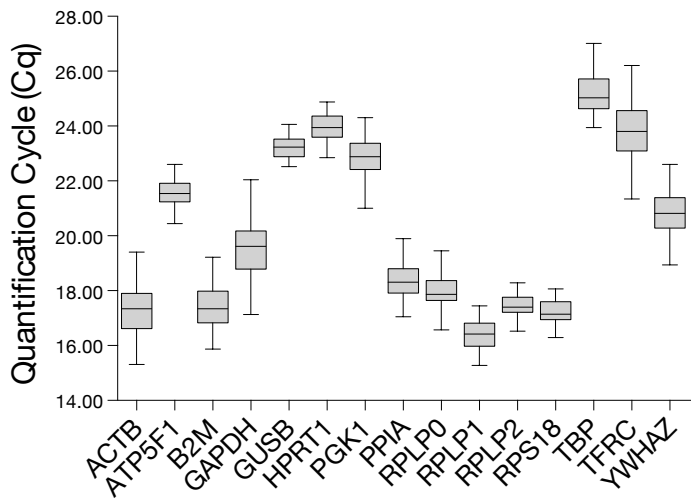

19

20 **Supplementary Figure S1. Quantification cycle (Cq) values for candidate reference genes**
